# Supplementary material for: Inactivation of Lsd1 triggers senescence in trophoblast stem cells by induction of Sirt4
Source: PubMed Central journal article supplement (PMC5386490; doi:10.1038/cddis.2017.48), 2017-02-23

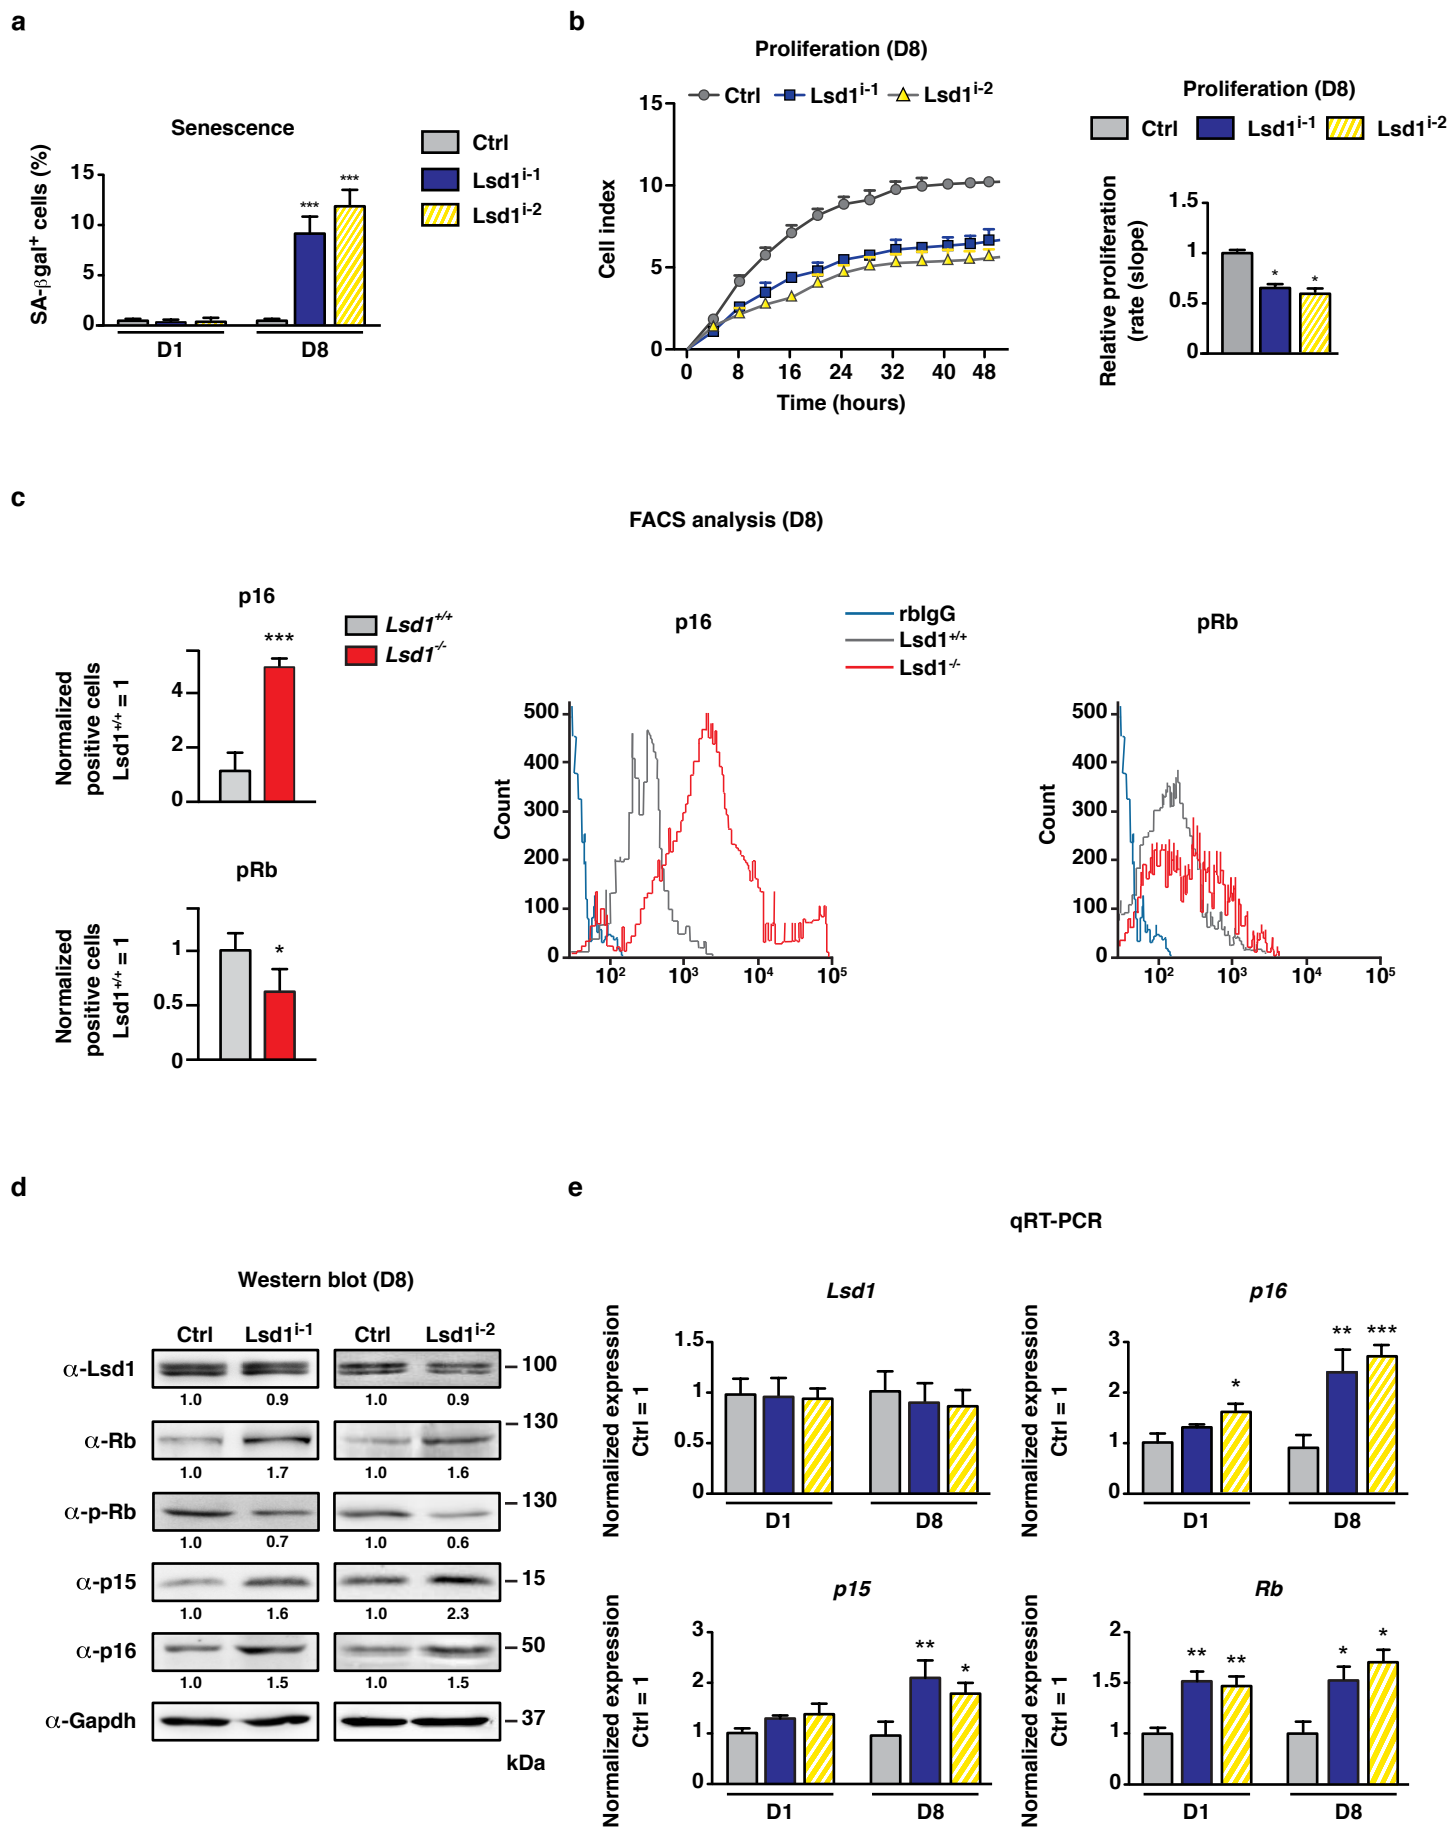

f

## FACS analysis

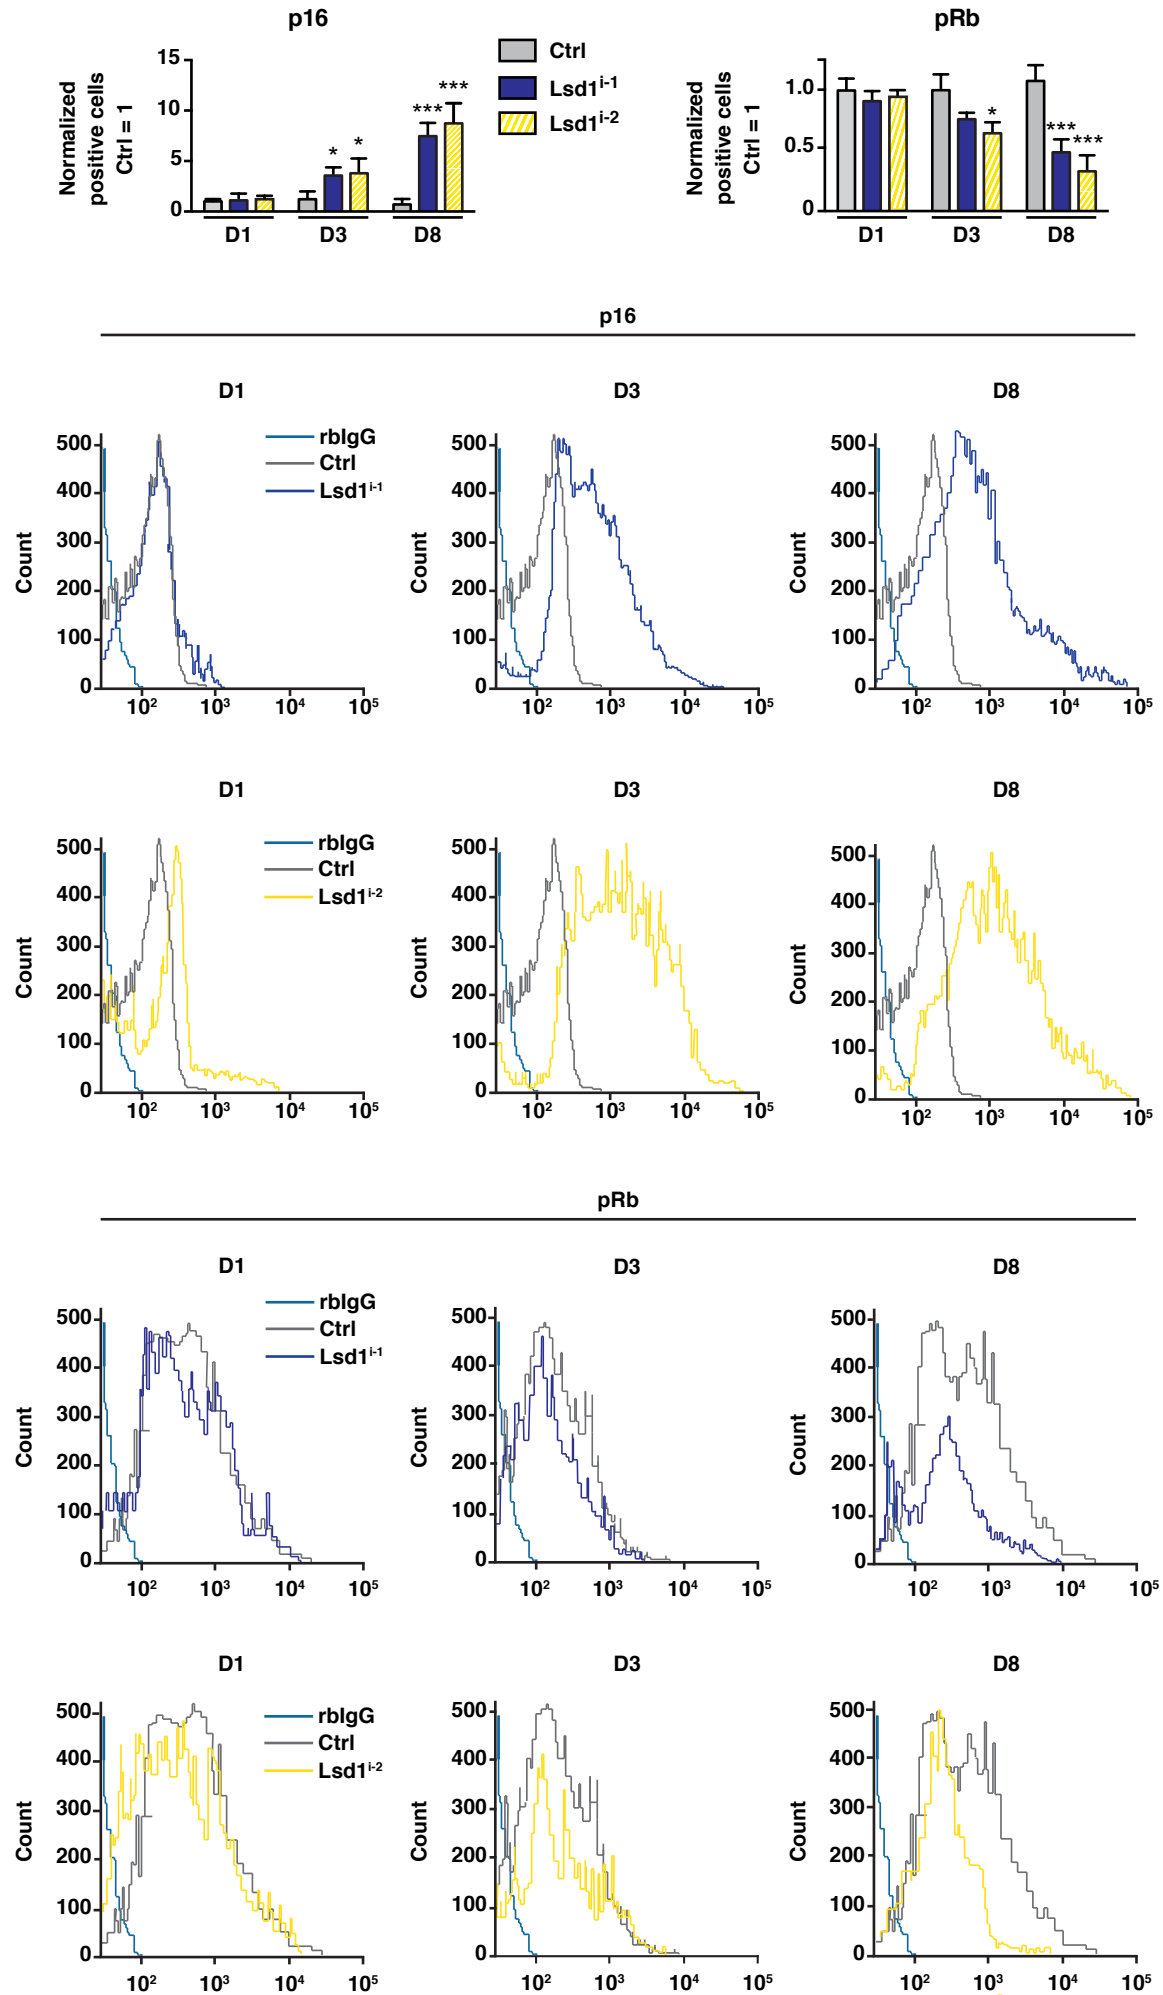

**g**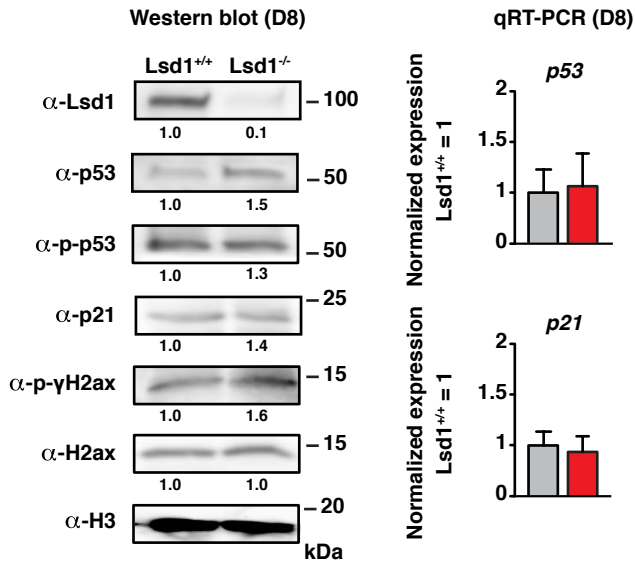**h**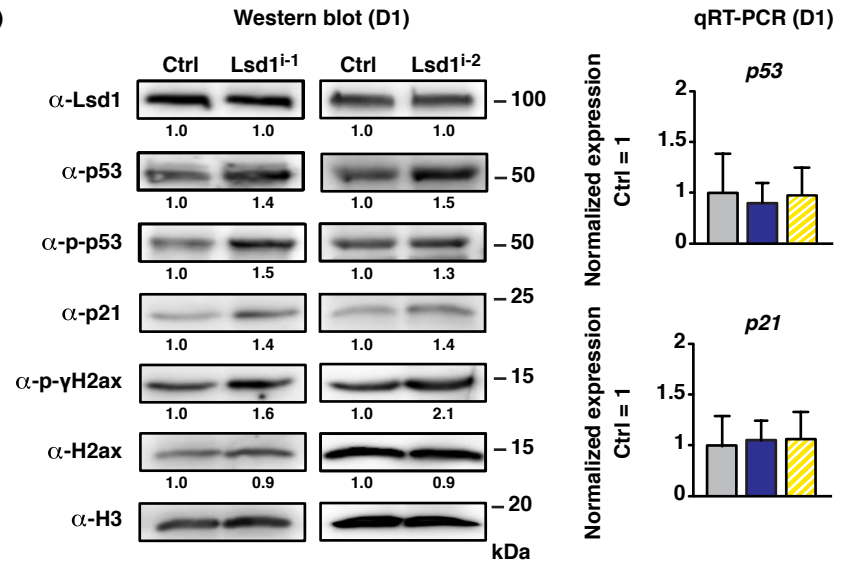

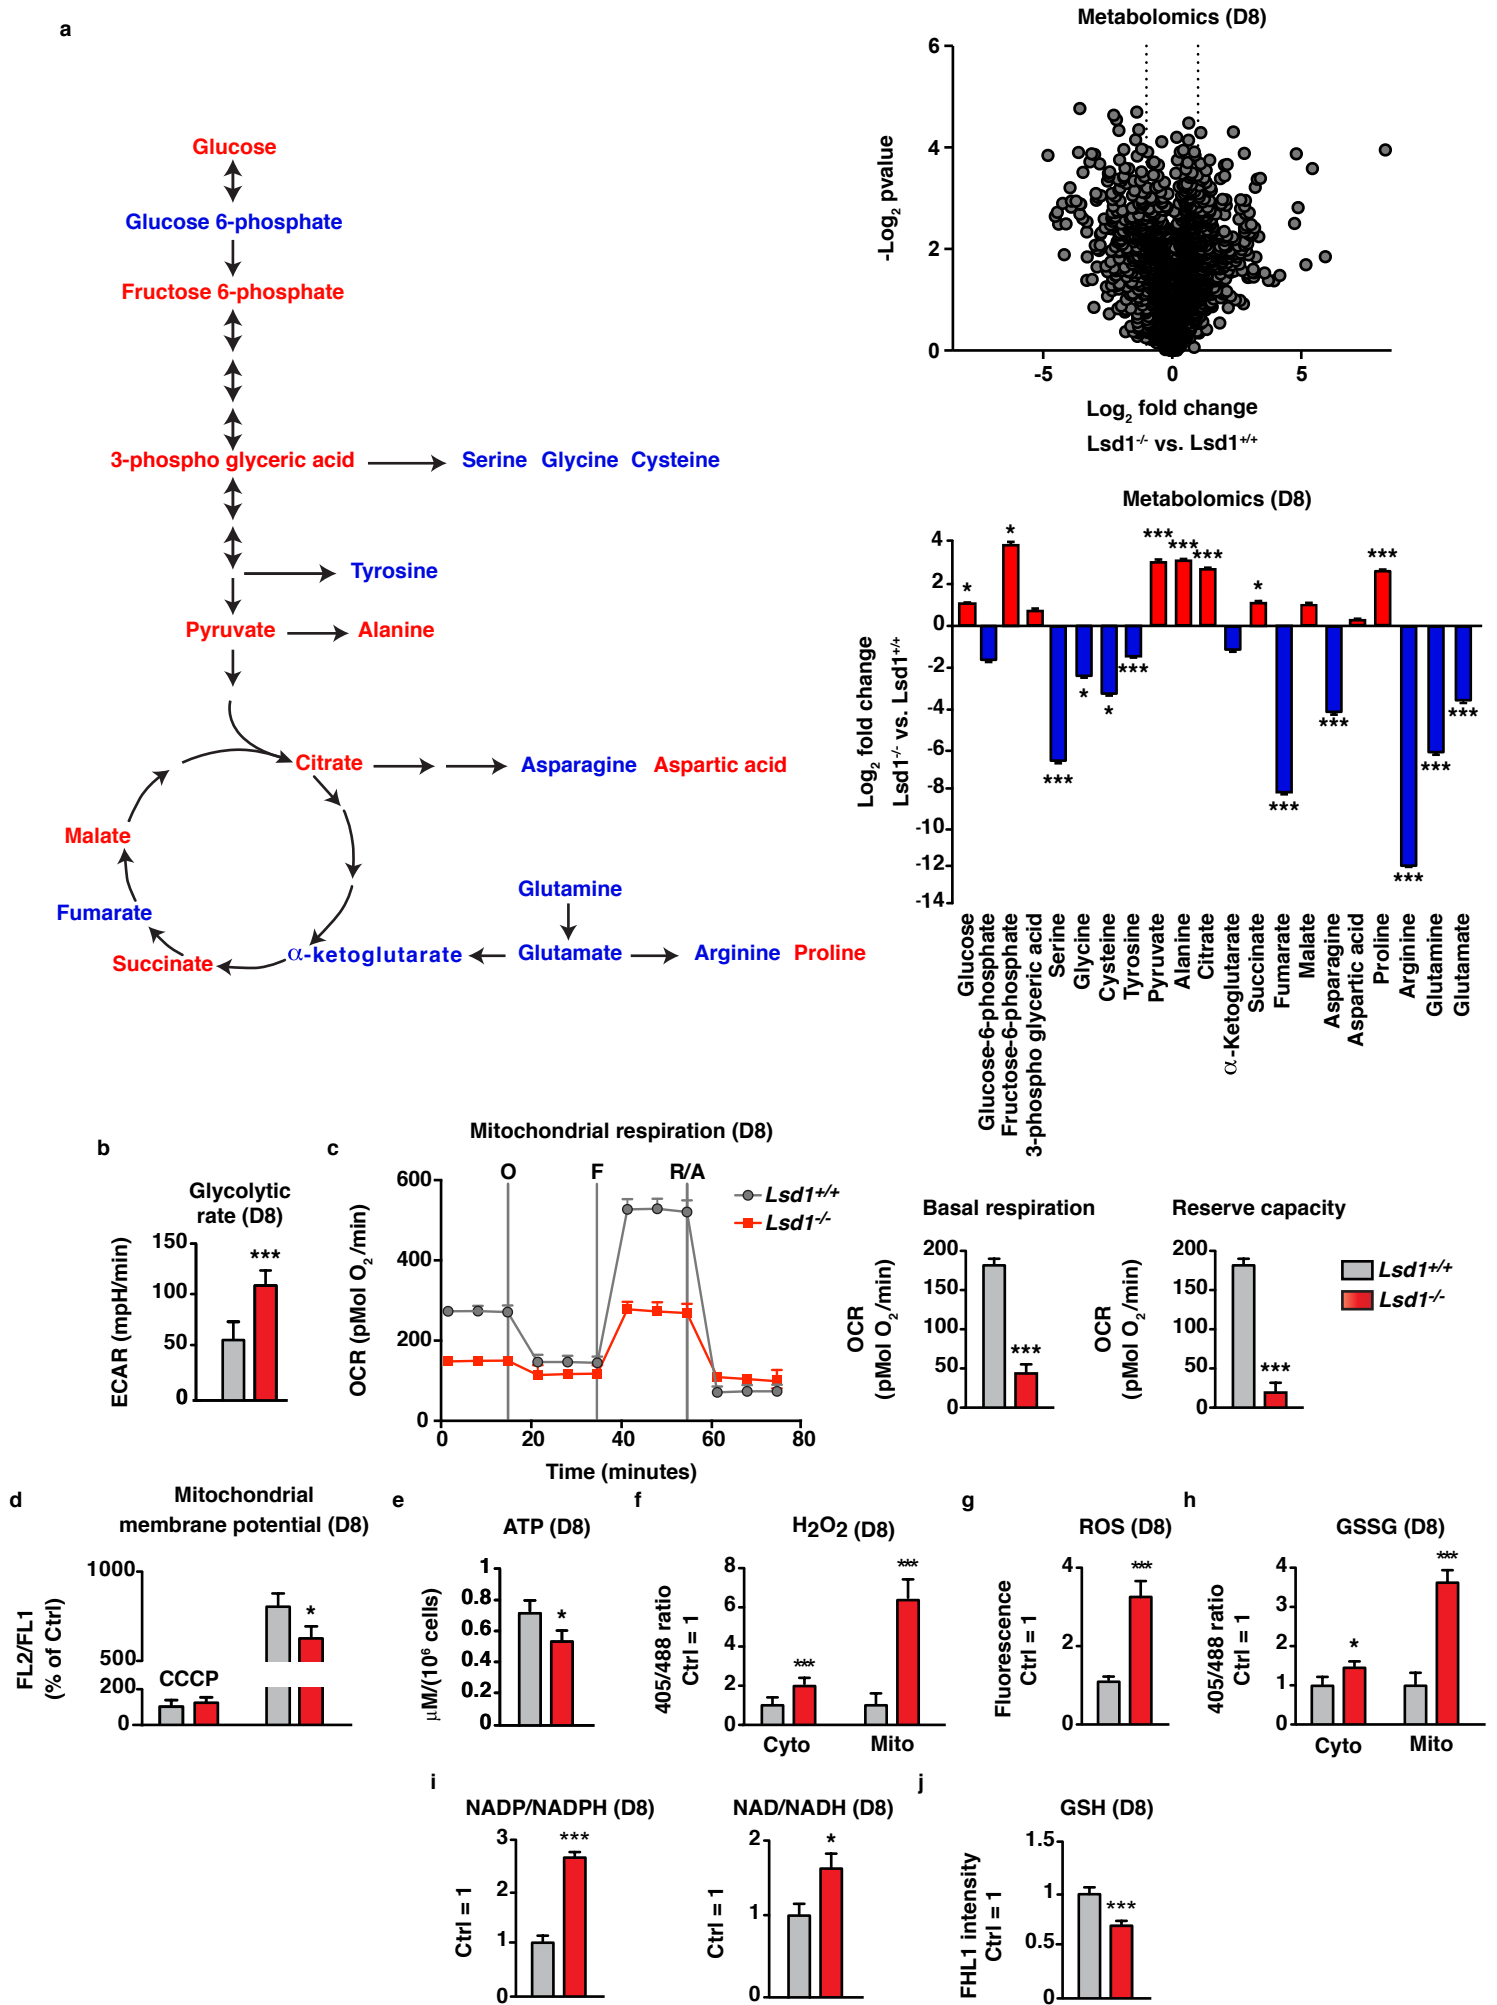

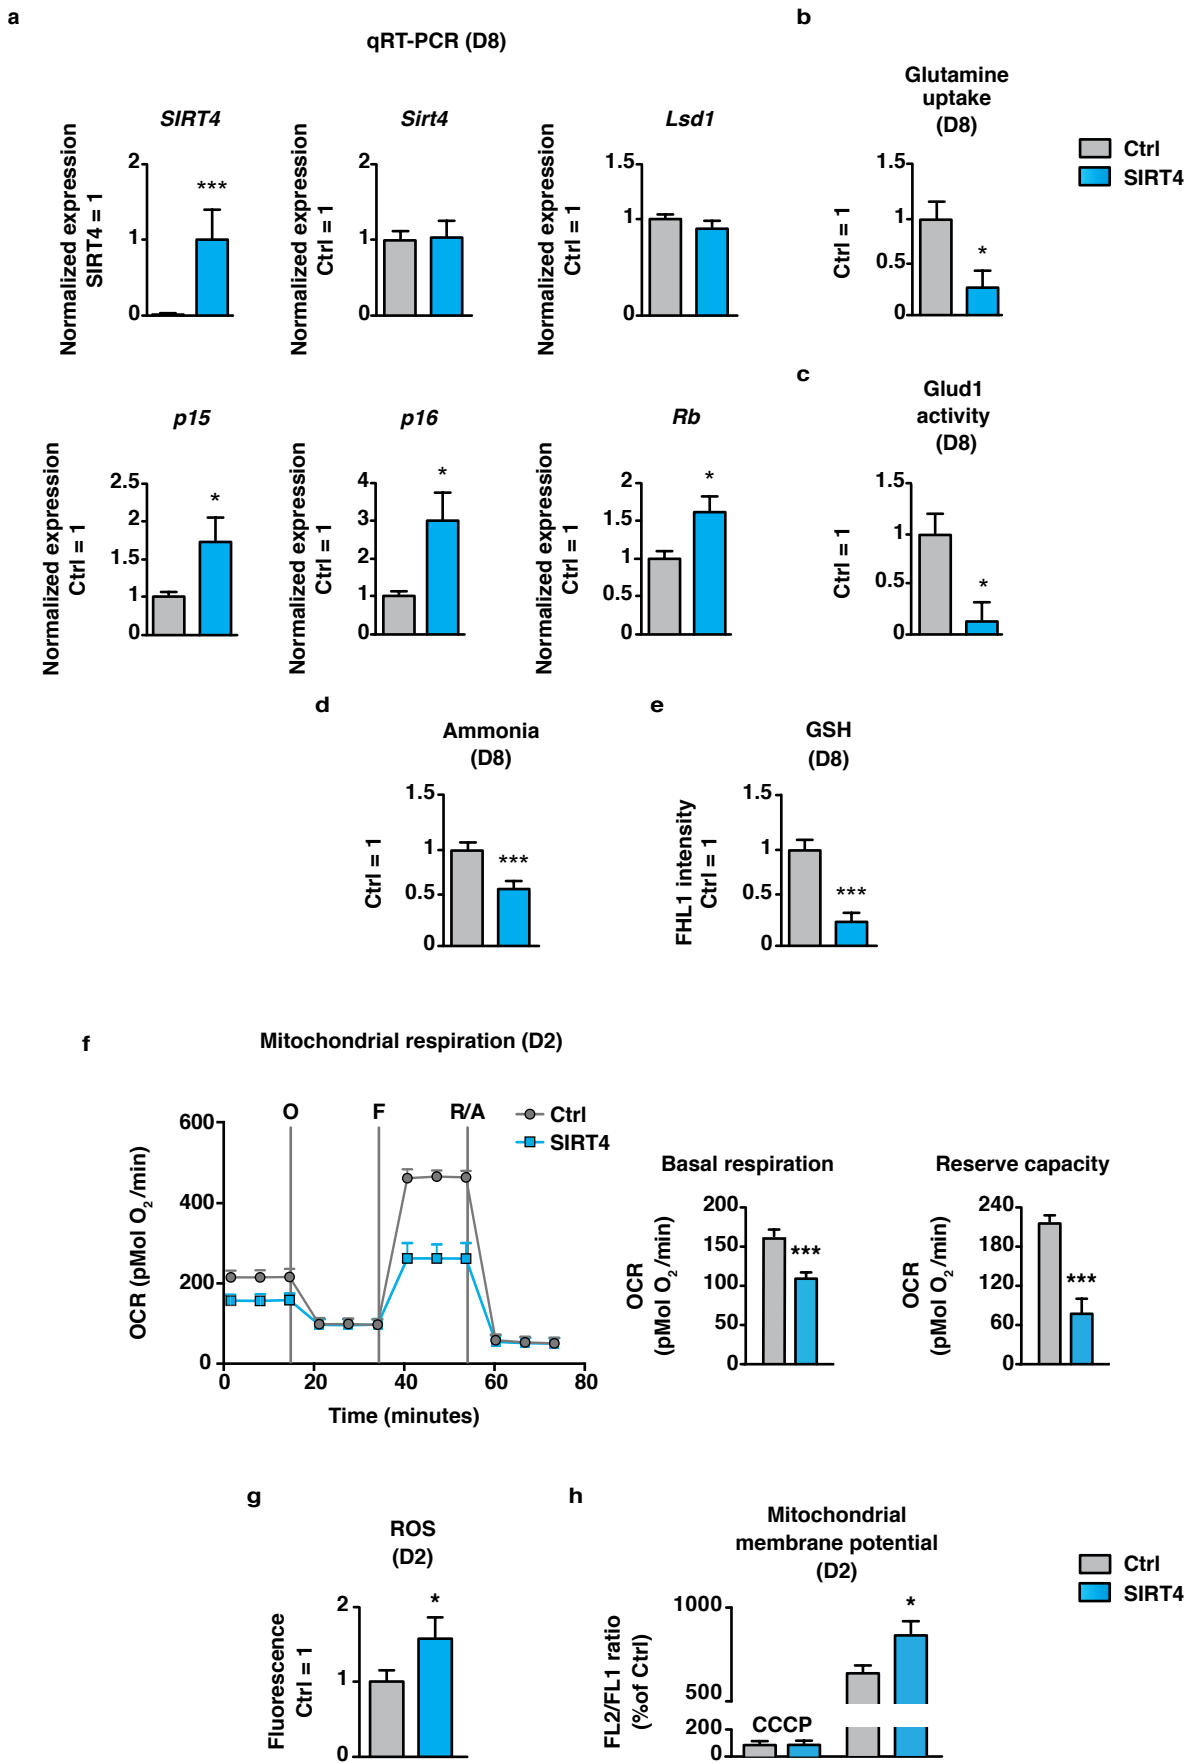

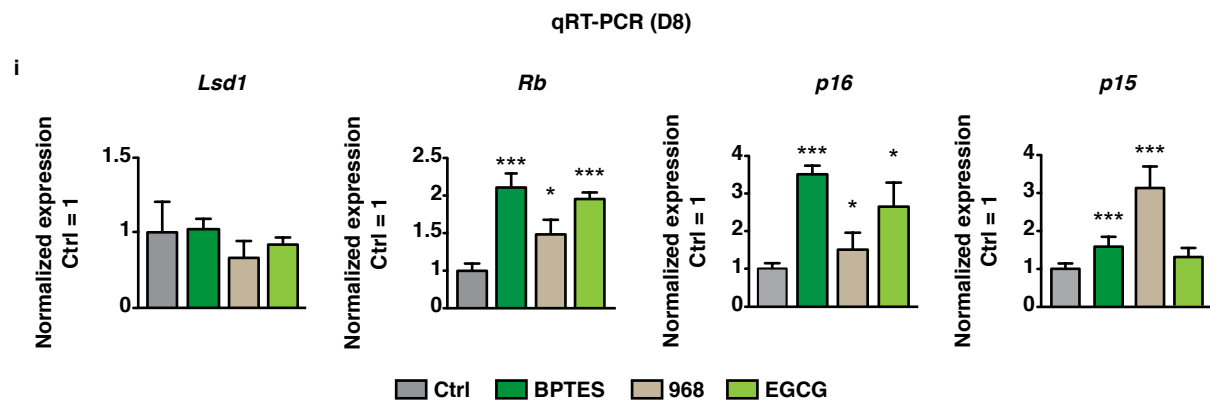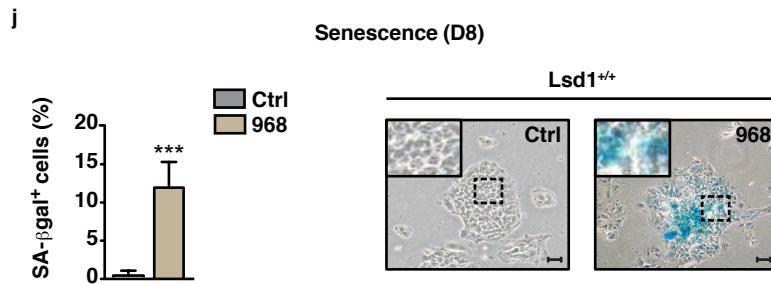

a

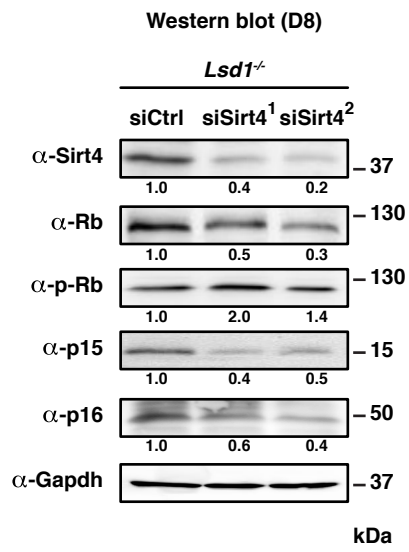

Supplement: cddis201748x1.pdf [file cddis201748x1.pdf]
